# Supplementary material for: Metabolism Analysis of Alantolactone and Isoalantolactone in Rats by Oral Administration
Source: Hindawi journal article supplement (doi:10.1155/2018/2026357), 2018-01-01
Supplement: f1 [file 2026357.f1.docx]

**Metabolism analysis of alantolactone and isoalantolactone in rats by oral administration**

Supporting information

FIGURE1: HR ESI (+) MS spectrum of alantolactone detected in bile

FIGURE 2: HR ESI (+) MS spectrum of alantolactone metabolite M1 detected in bile

FIGURE 3: HR ESI (+) MS spectrum of alantolactone metabolite M2 detected in bile

FIGURE 4: HR ESI (+) MS spectrum of alantolactone metabolite M3 detected in bile

FIGURE 5: HR ESI (+) MS spectrum of alantolactone metabolite M4 detected in bile

FIGURE 6: HR ESI (+) MS spectrum of alantolactone metabolite M5 detected in bile

FIGURE 7: HR ESI (+) MS spectrum of isoalantolactone detected in bile

FIGURE 8: HR ESI (+) MS spectrum of isoalantolactone metabolite M6 detected in bile

FIGURE 9: HR ESI (+) MS spectrum of isoalantolactone metabolite M7 detected in bile

FIGURE 10: HR ESI (+) MS spectrum of isoalantolactone metabolite M8 detected in bile

FIGURE 11: HR ESI (+) MS spectrum of isoalantolactone metabolite M9 detected in bile


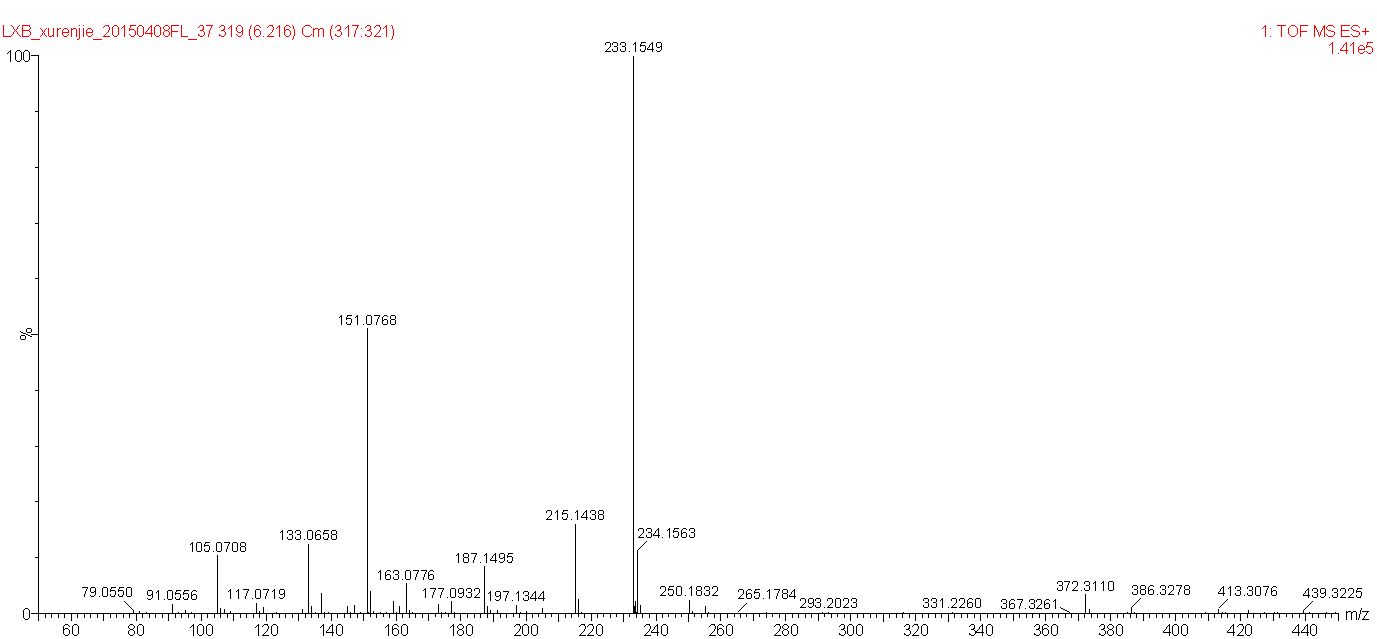


FIGURE1: HR ESI (+) MS spectrum of alantolactone detected in bile


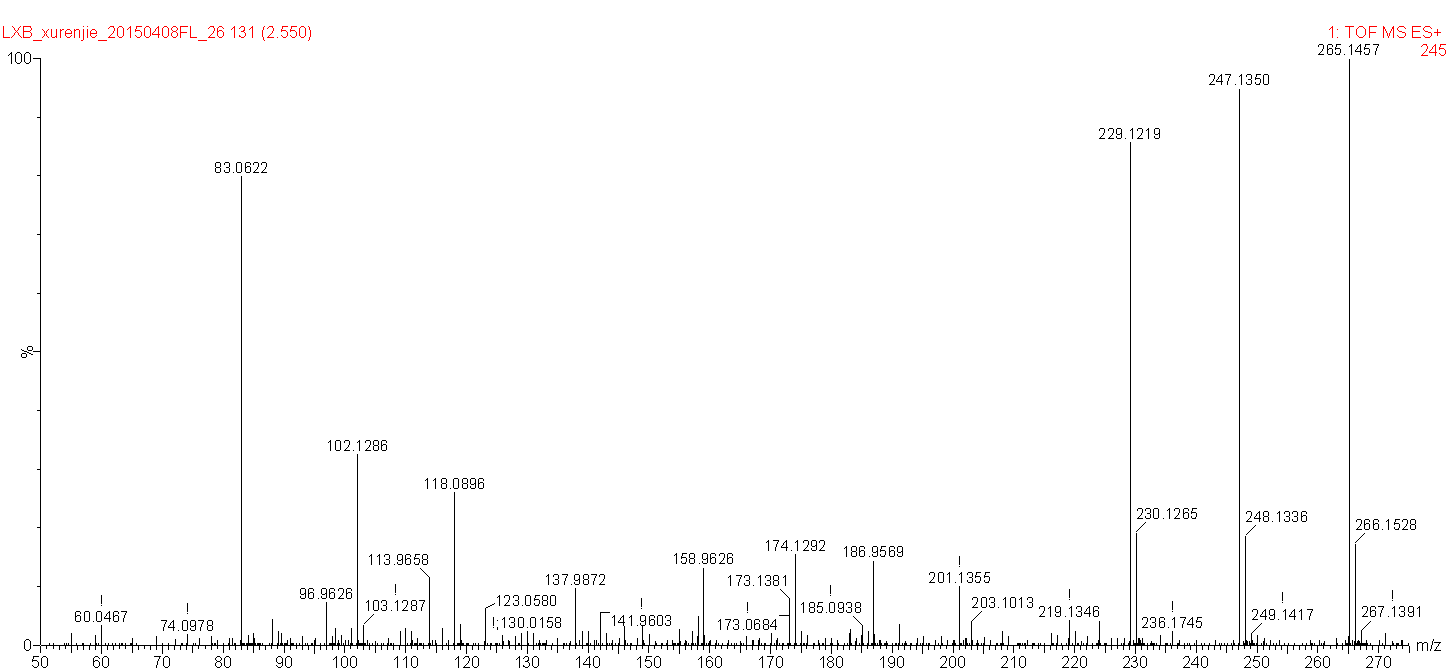


FIGURE 2: HR ESI (+) MS spectrum of alantolactone metabolite M1 detected in bile


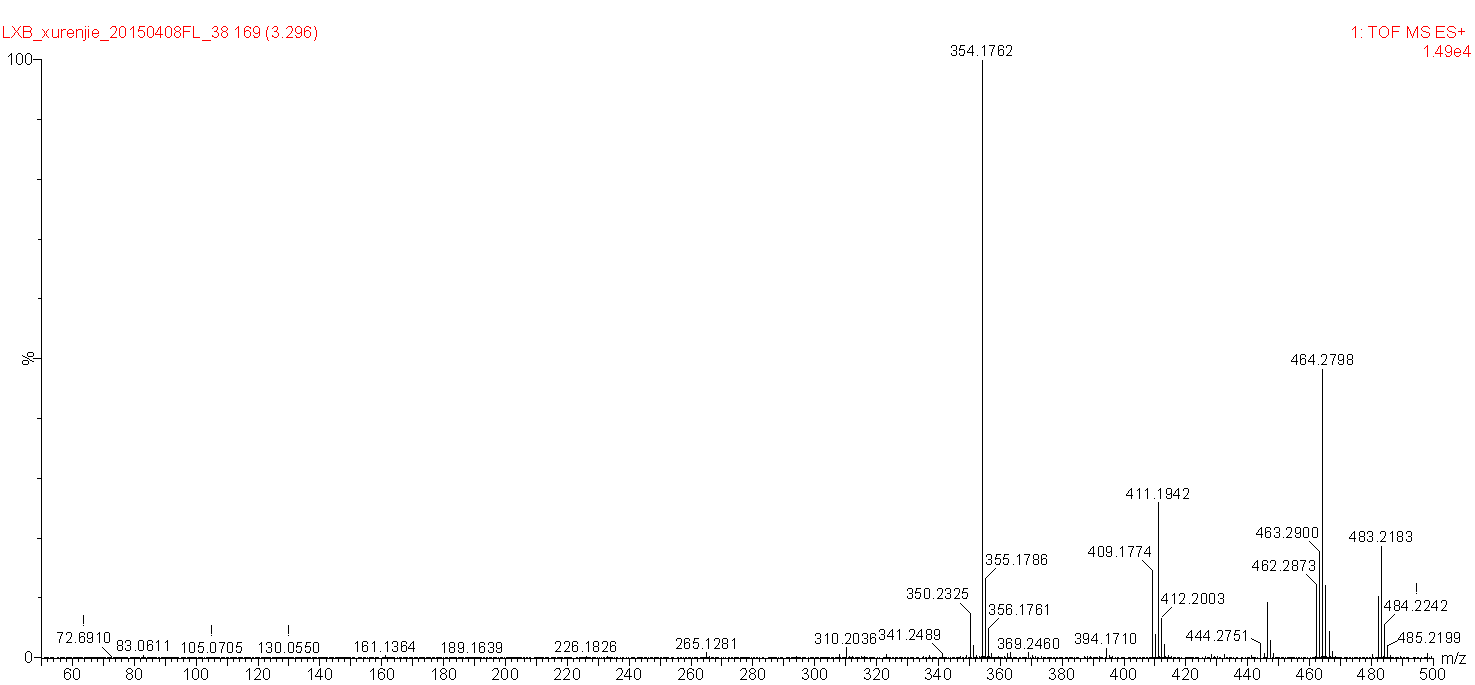


FIGURE 3: HR ESI (+) MS spectrum of alantolactone metabolite M2 detected in bile
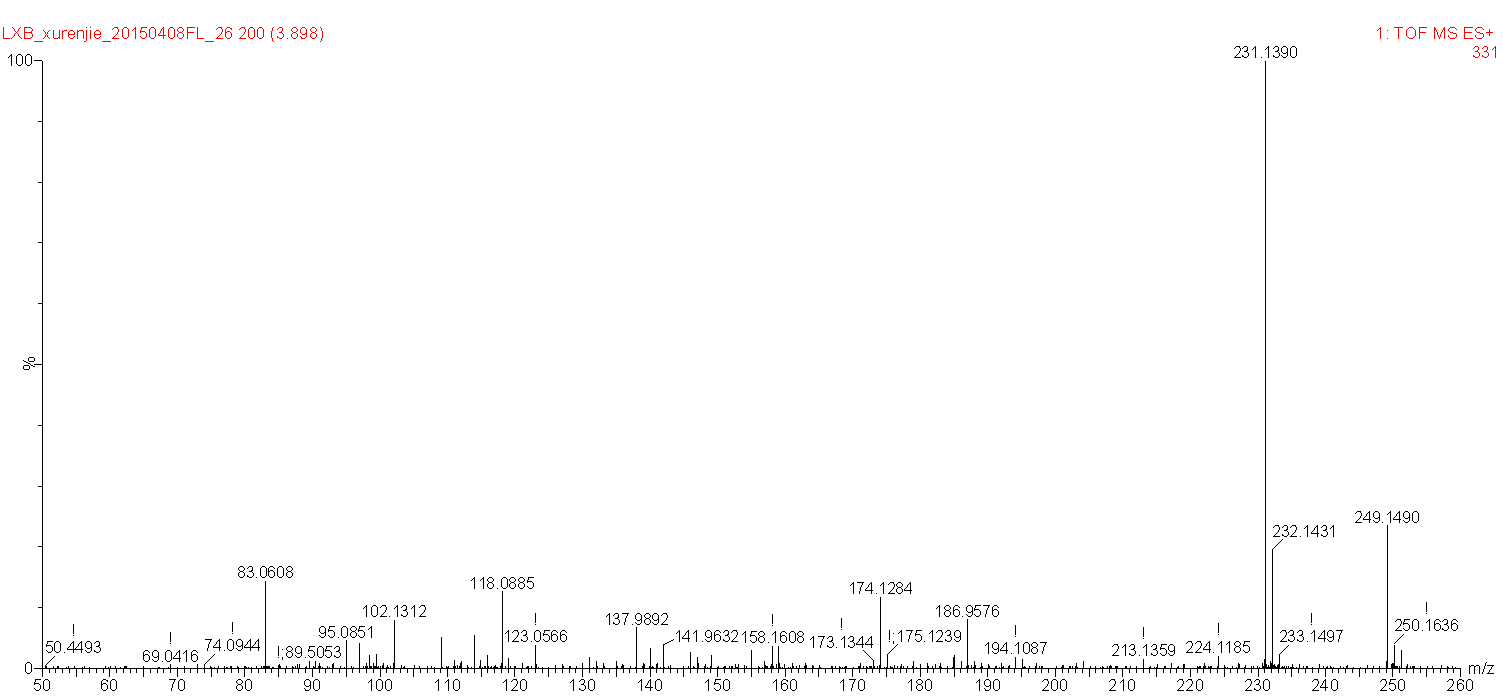


FIGURE 4: HR ESI (+) MS spectrum of alantolactone metabolite M3 detected in bile


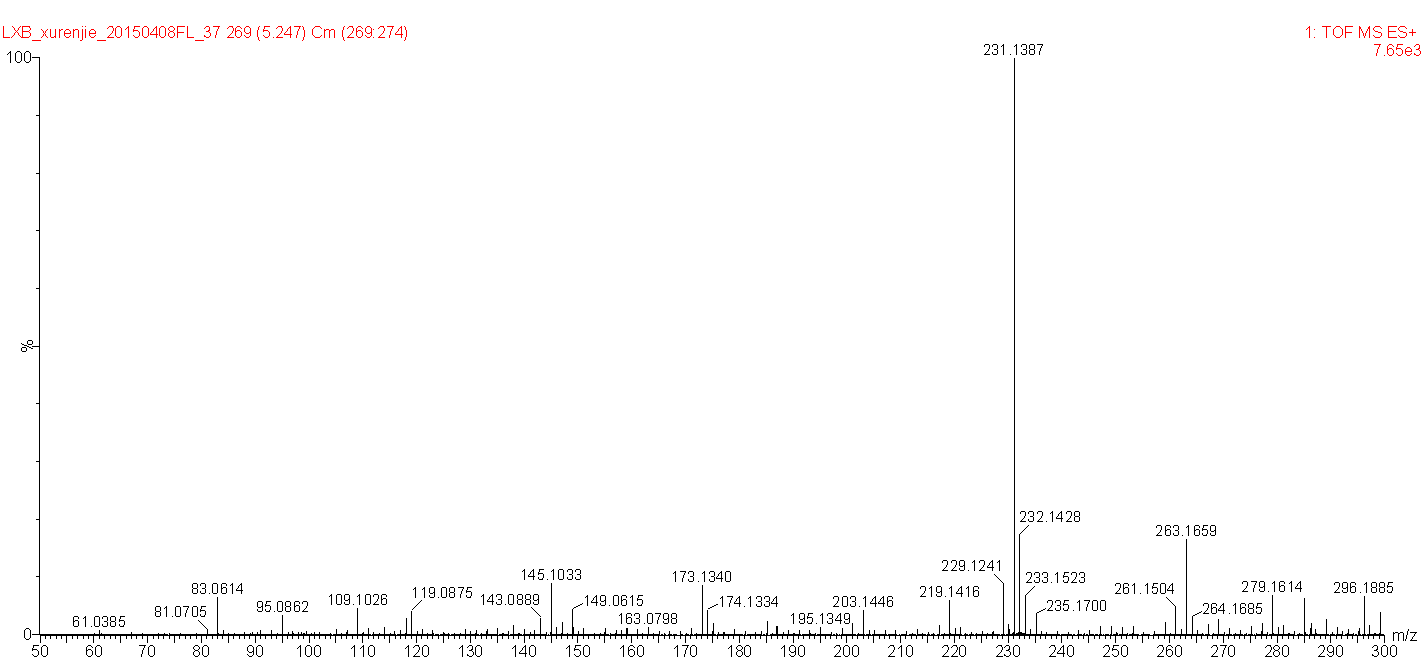


FIGURE 5: HR ESI (+) MS spectrum of alantolactone metabolite M4 detected in bile


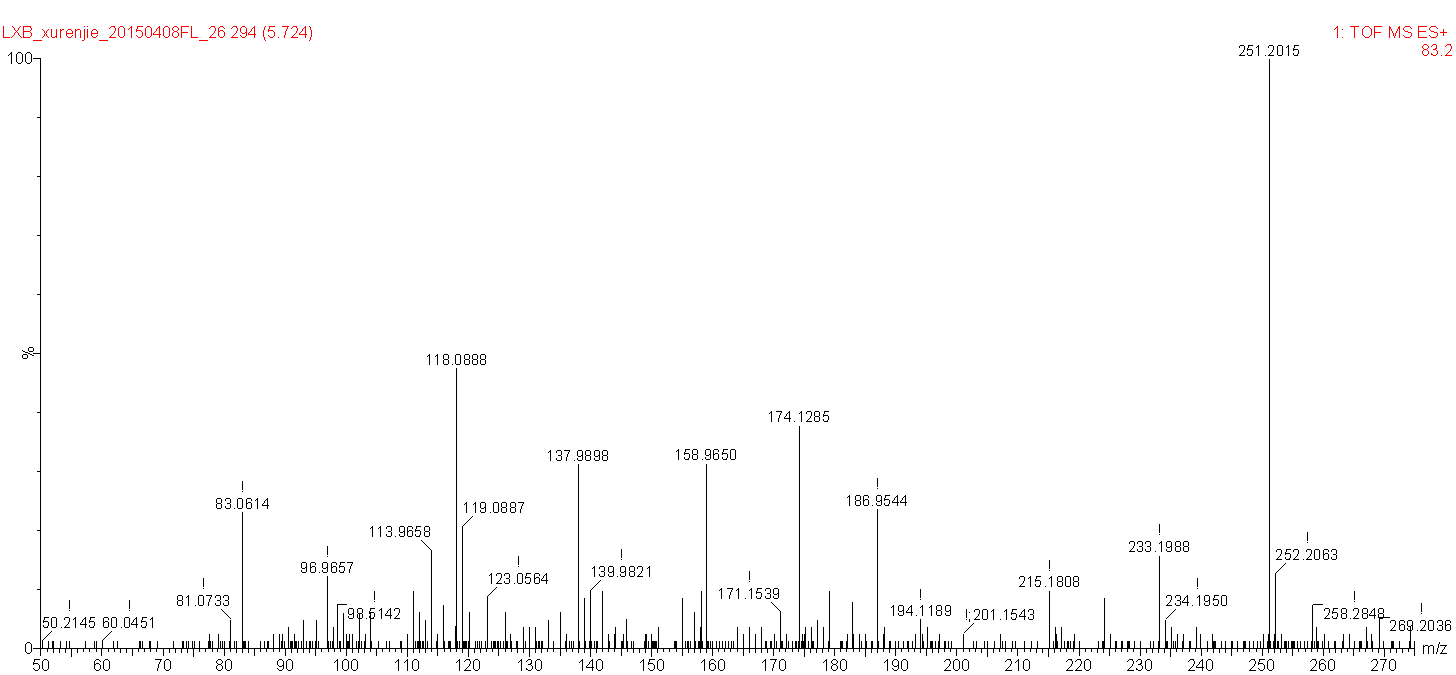


FIGURE 6: HR ESI (+) MS spectrum of alantolactone metabolite M5 detected in bile
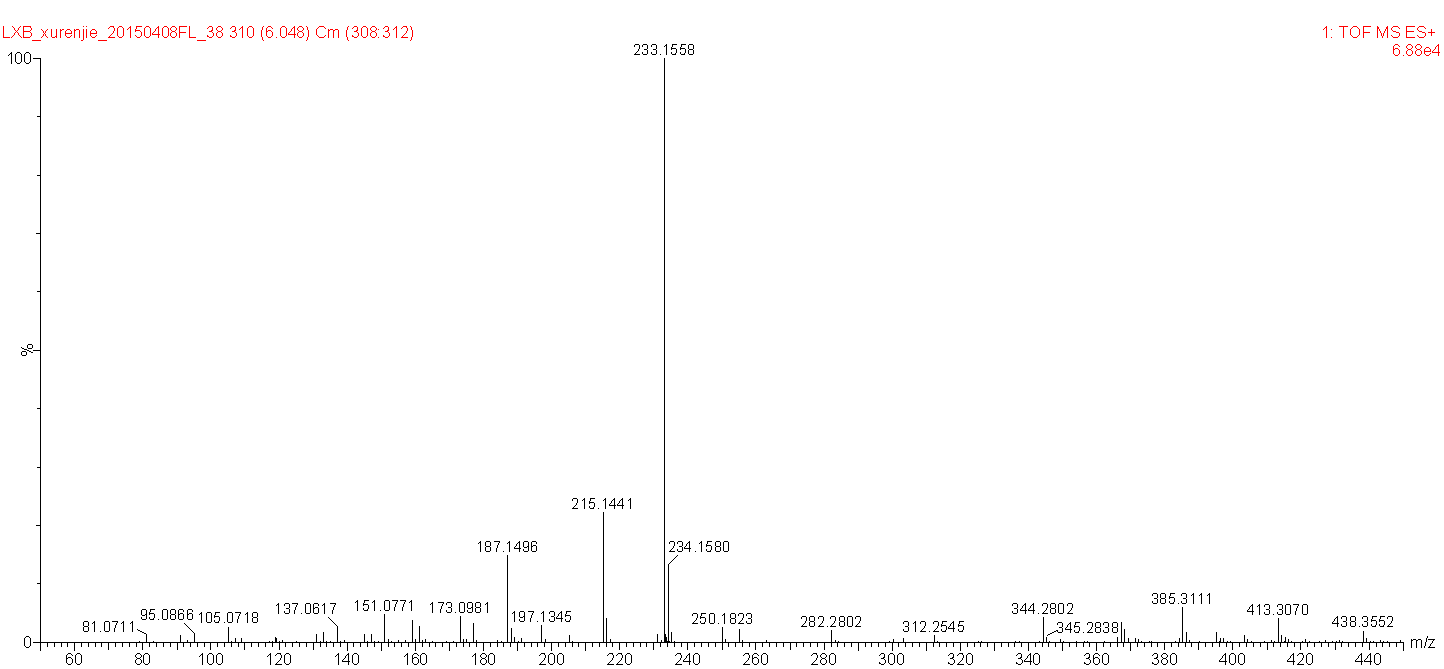


FIGURE 7: HR ESI (+) MS spectrum of isoalantolactone detected in bile


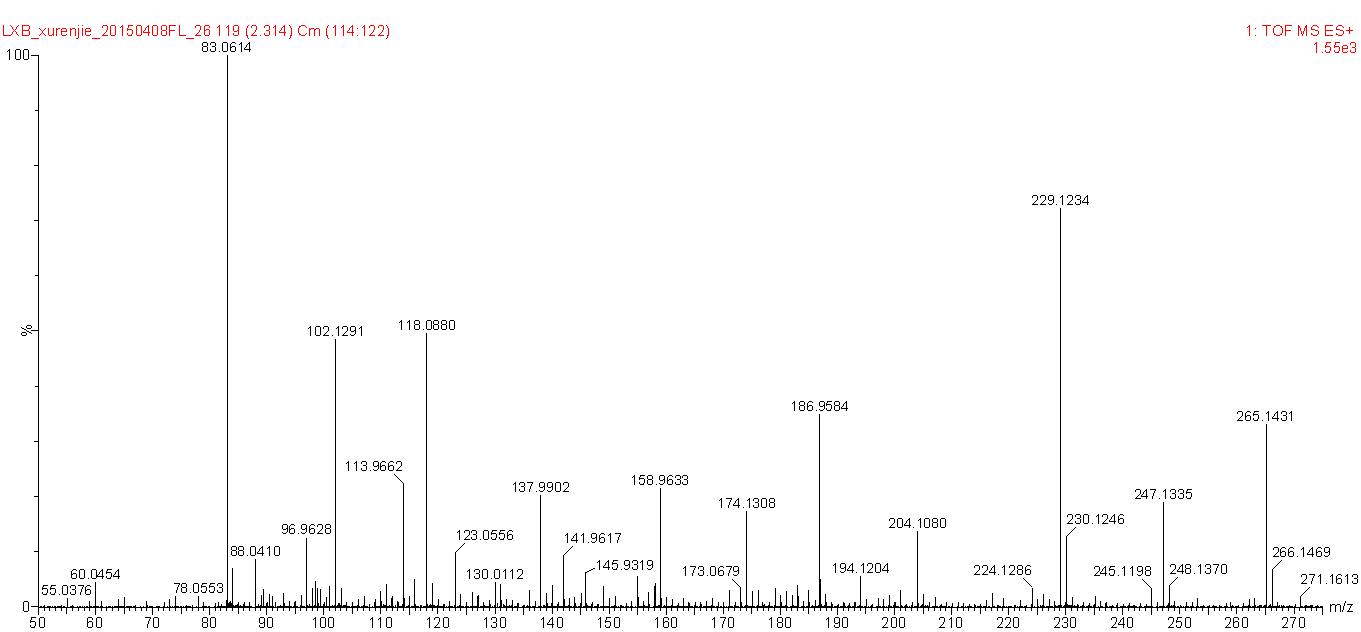


FIGURE 8: HR ESI (+) MS spectrum of isoalantolactone metabolite M6 detected in bile


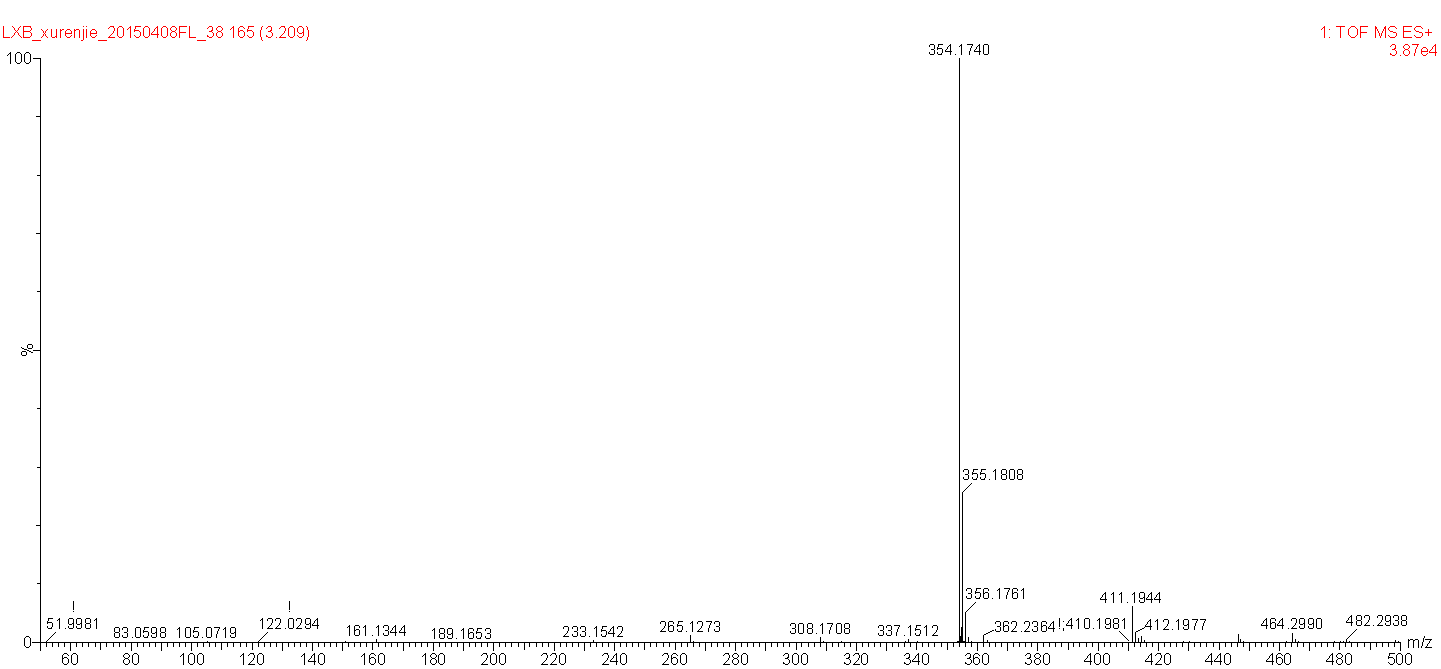


FIGURE 9: HR ESI (+) MS spectrum of isoalantolactone metabolite M7 detected in bile


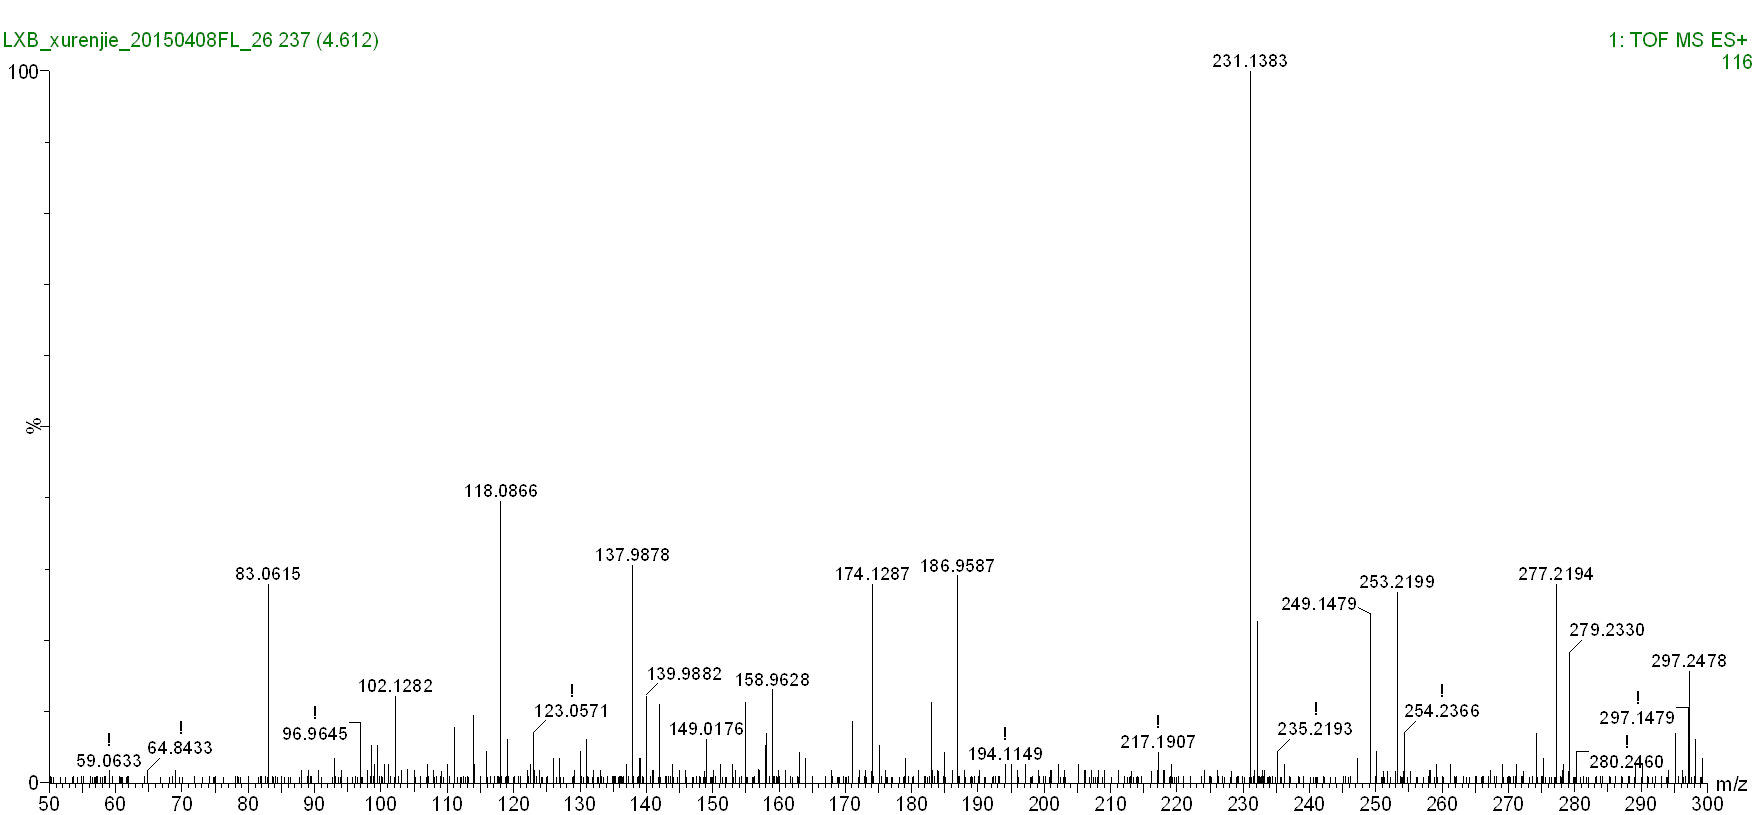


FIGURE 10: HR ESI (+) MS spectrum of isoalantolactone metabolite M8 detected in bile


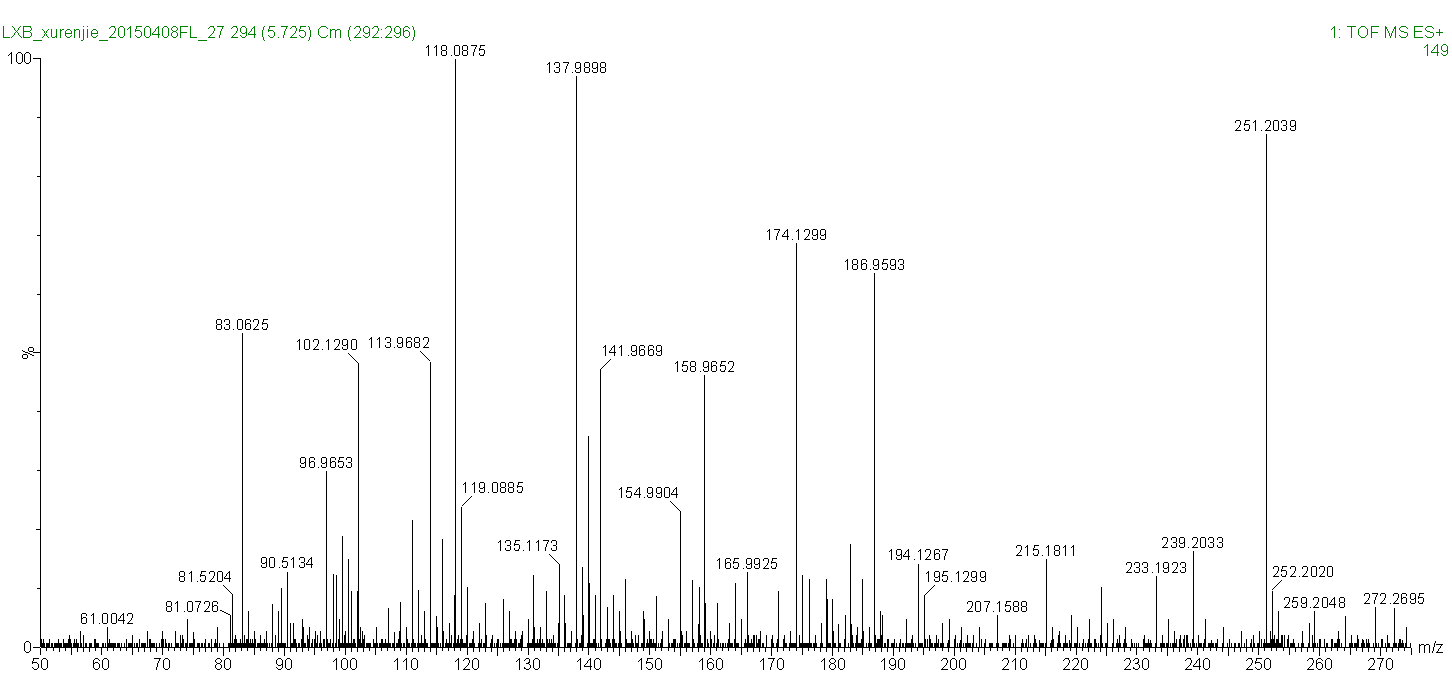


FIGURE 11: HR ESI (+) MS spectrum of isoalantolactone metabolite M9 detected in bile
